# Supplementary material
Source: ML conference proceedings conference paper supplement (https://openreview.net/forum?id=clKjOYw22x)
Supplement: supplementary_material [file attachment]

Forest area

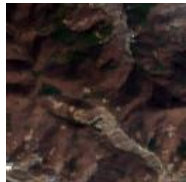

Optical image

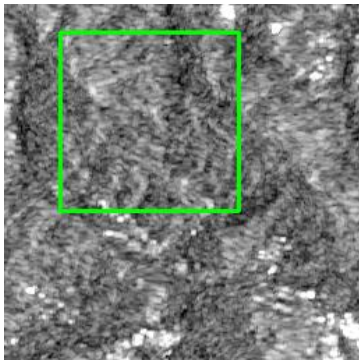

SAR image and GT

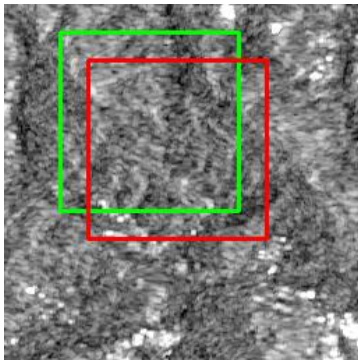

NMI

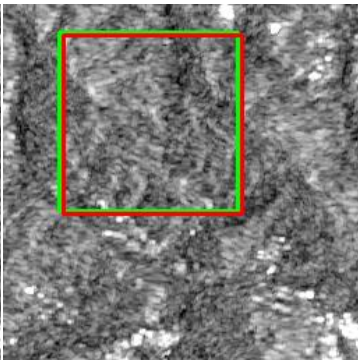

VSMATCH

**Green box:**  
GT

**Red box:**  
Prediction

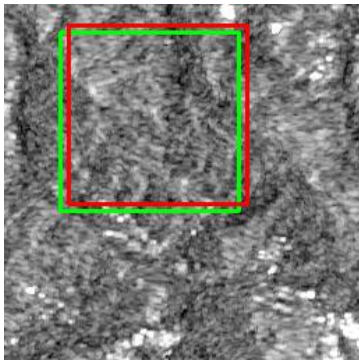

MARU-Net

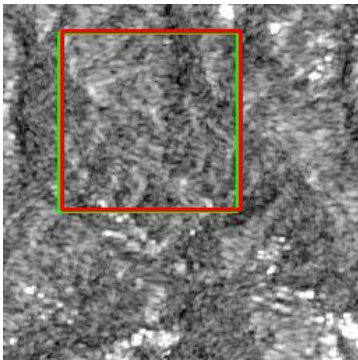

RSOMNet

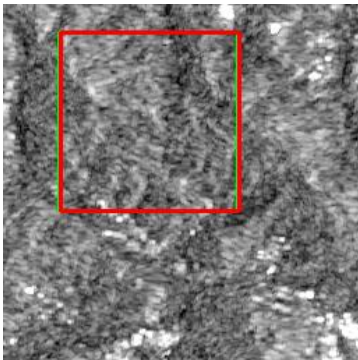

Ours
