# Supplementary material
Source: ML conference proceedings conference paper supplement (https://openreview.net/forum?id=clKjOYw22x)
Supplement: supplementary_material [file attachment]

Forest area

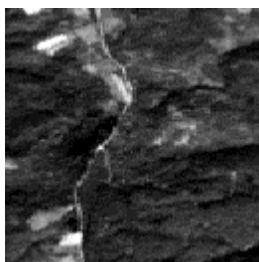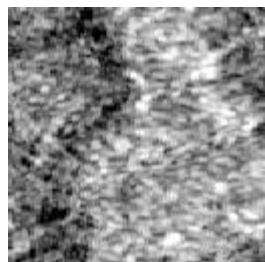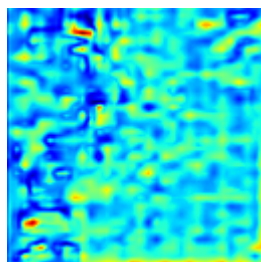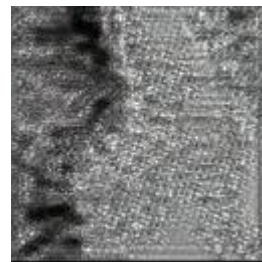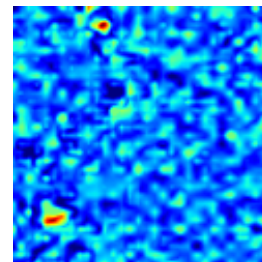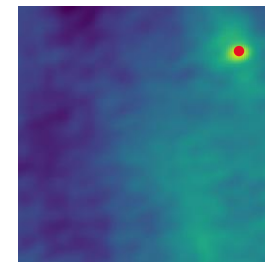

Urban area

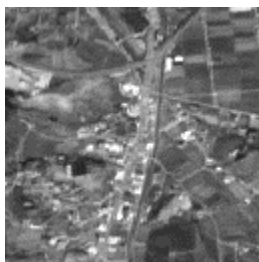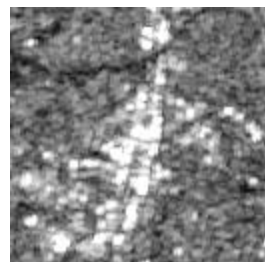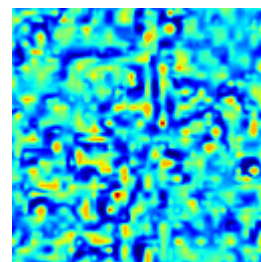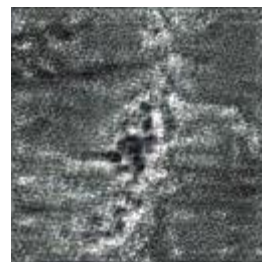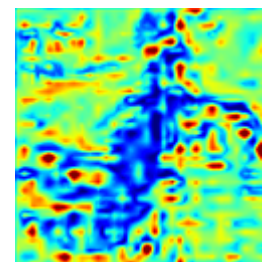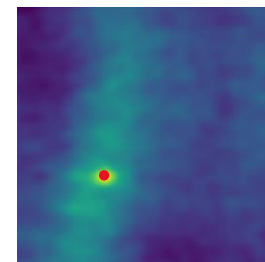

Urban built-up area

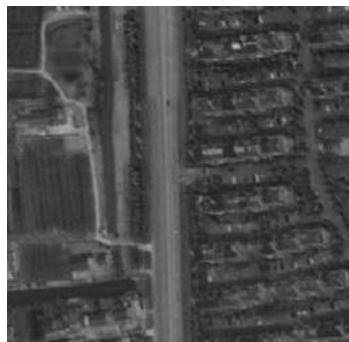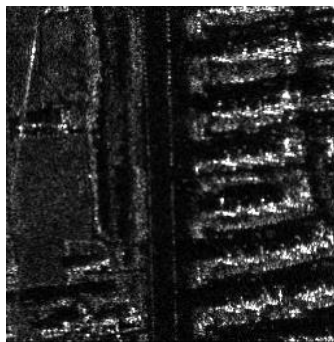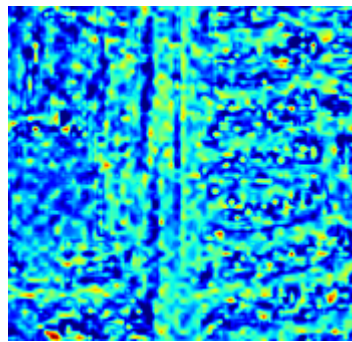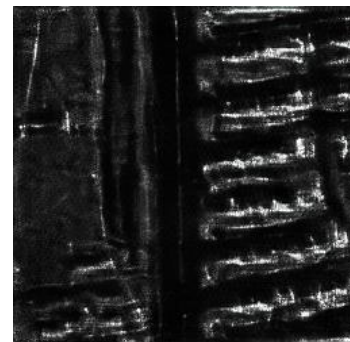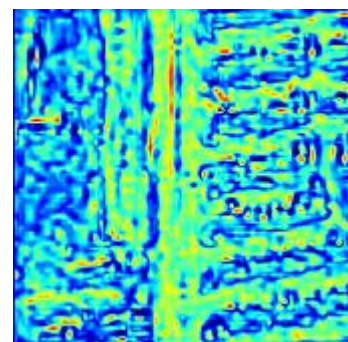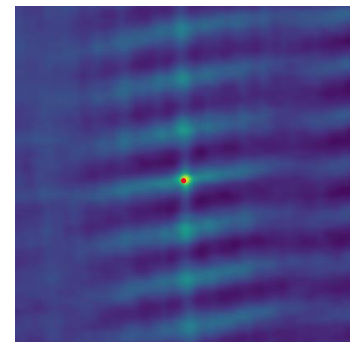

Rural farmland area

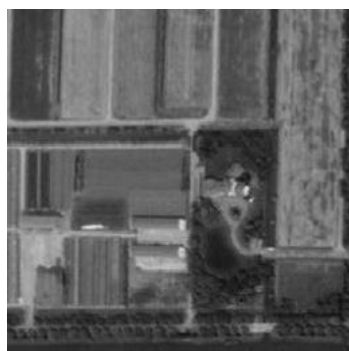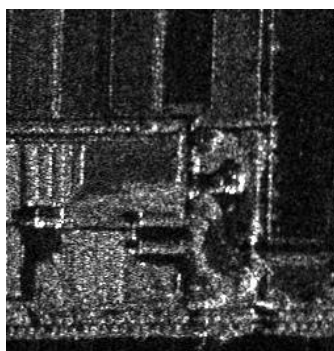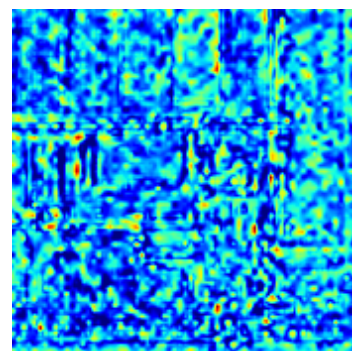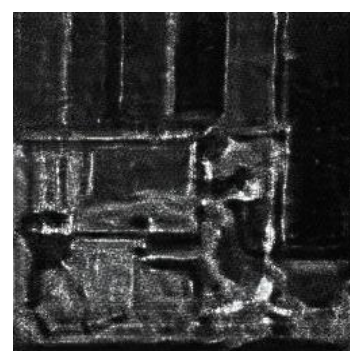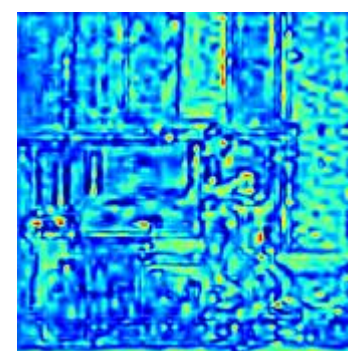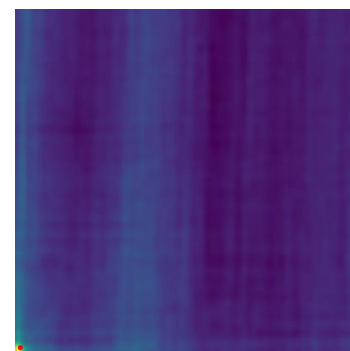

Template O

Template S

Template  $S'$ Template  $\hat{S}$ Template  $O'$ 

Similarity map
