# Supplementary material
Source: ML conference proceedings conference paper supplement (https://openreview.net/forum?id=clKjOYw22x)
Supplement: supplementary_material [file attachment]

Urban built-up area

Rural farmland area

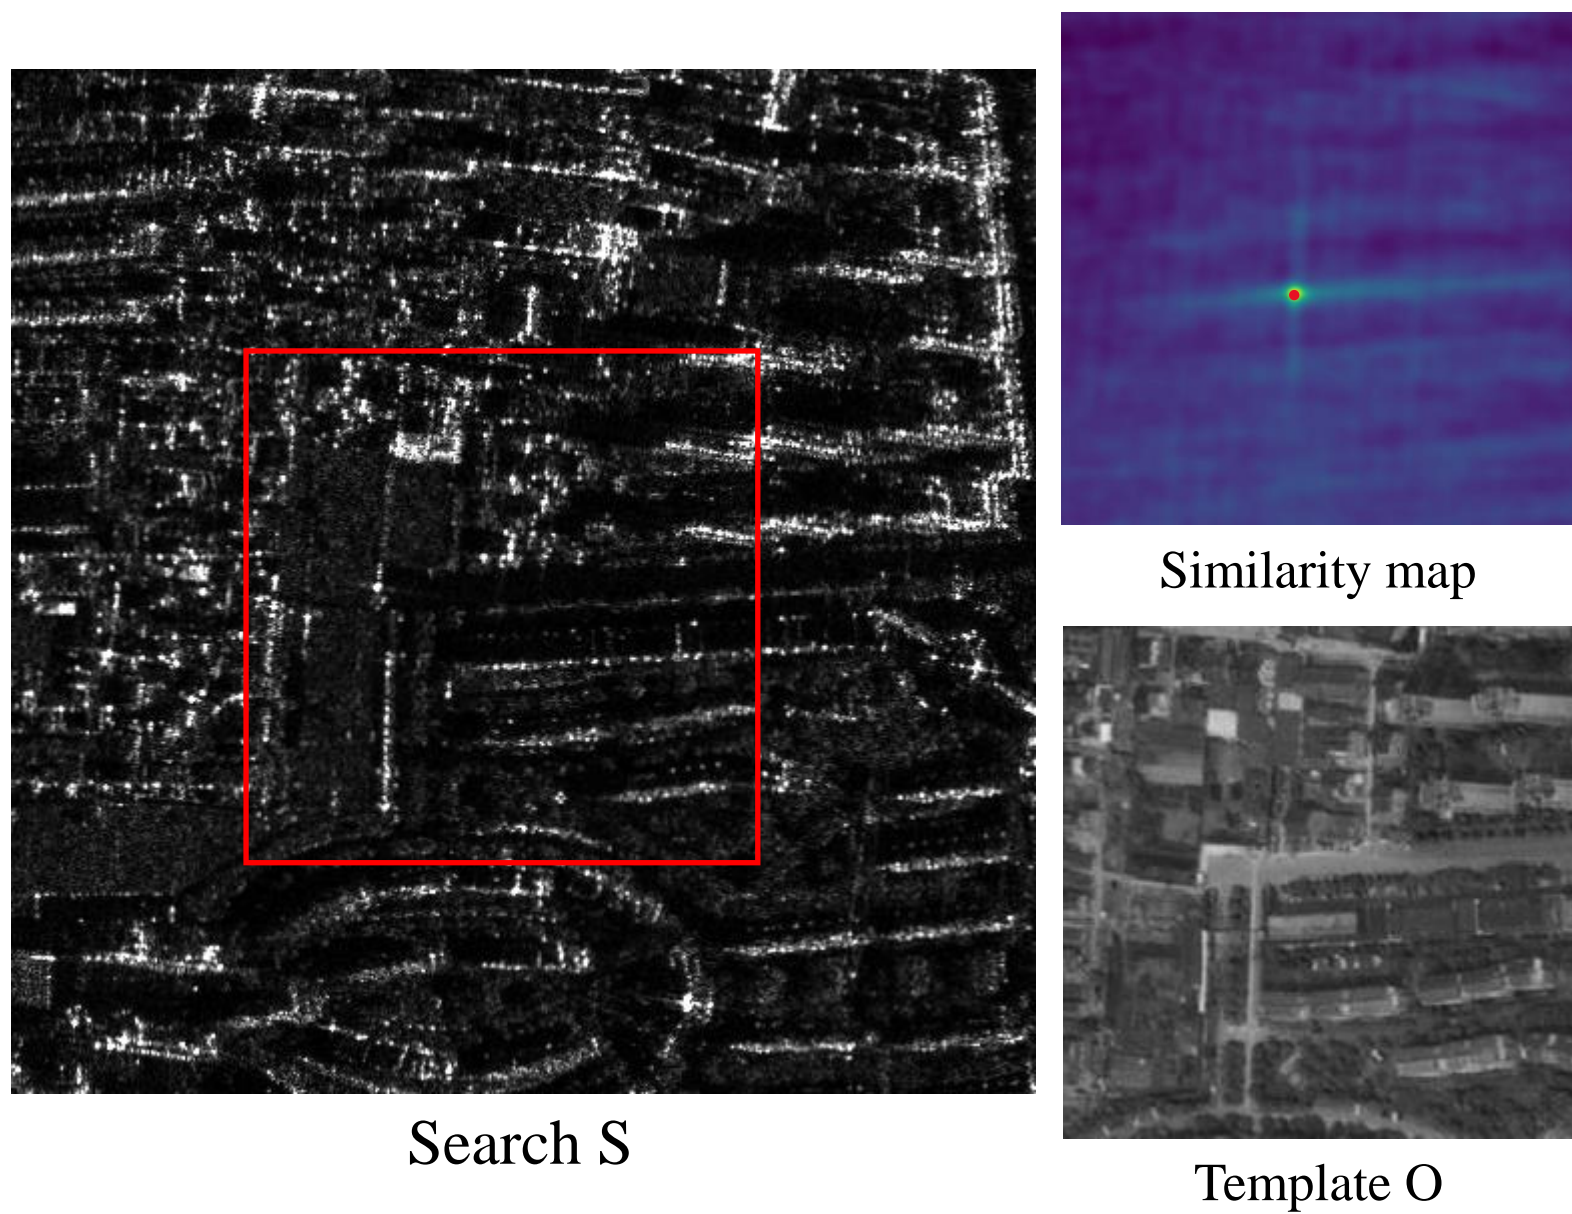

(a)

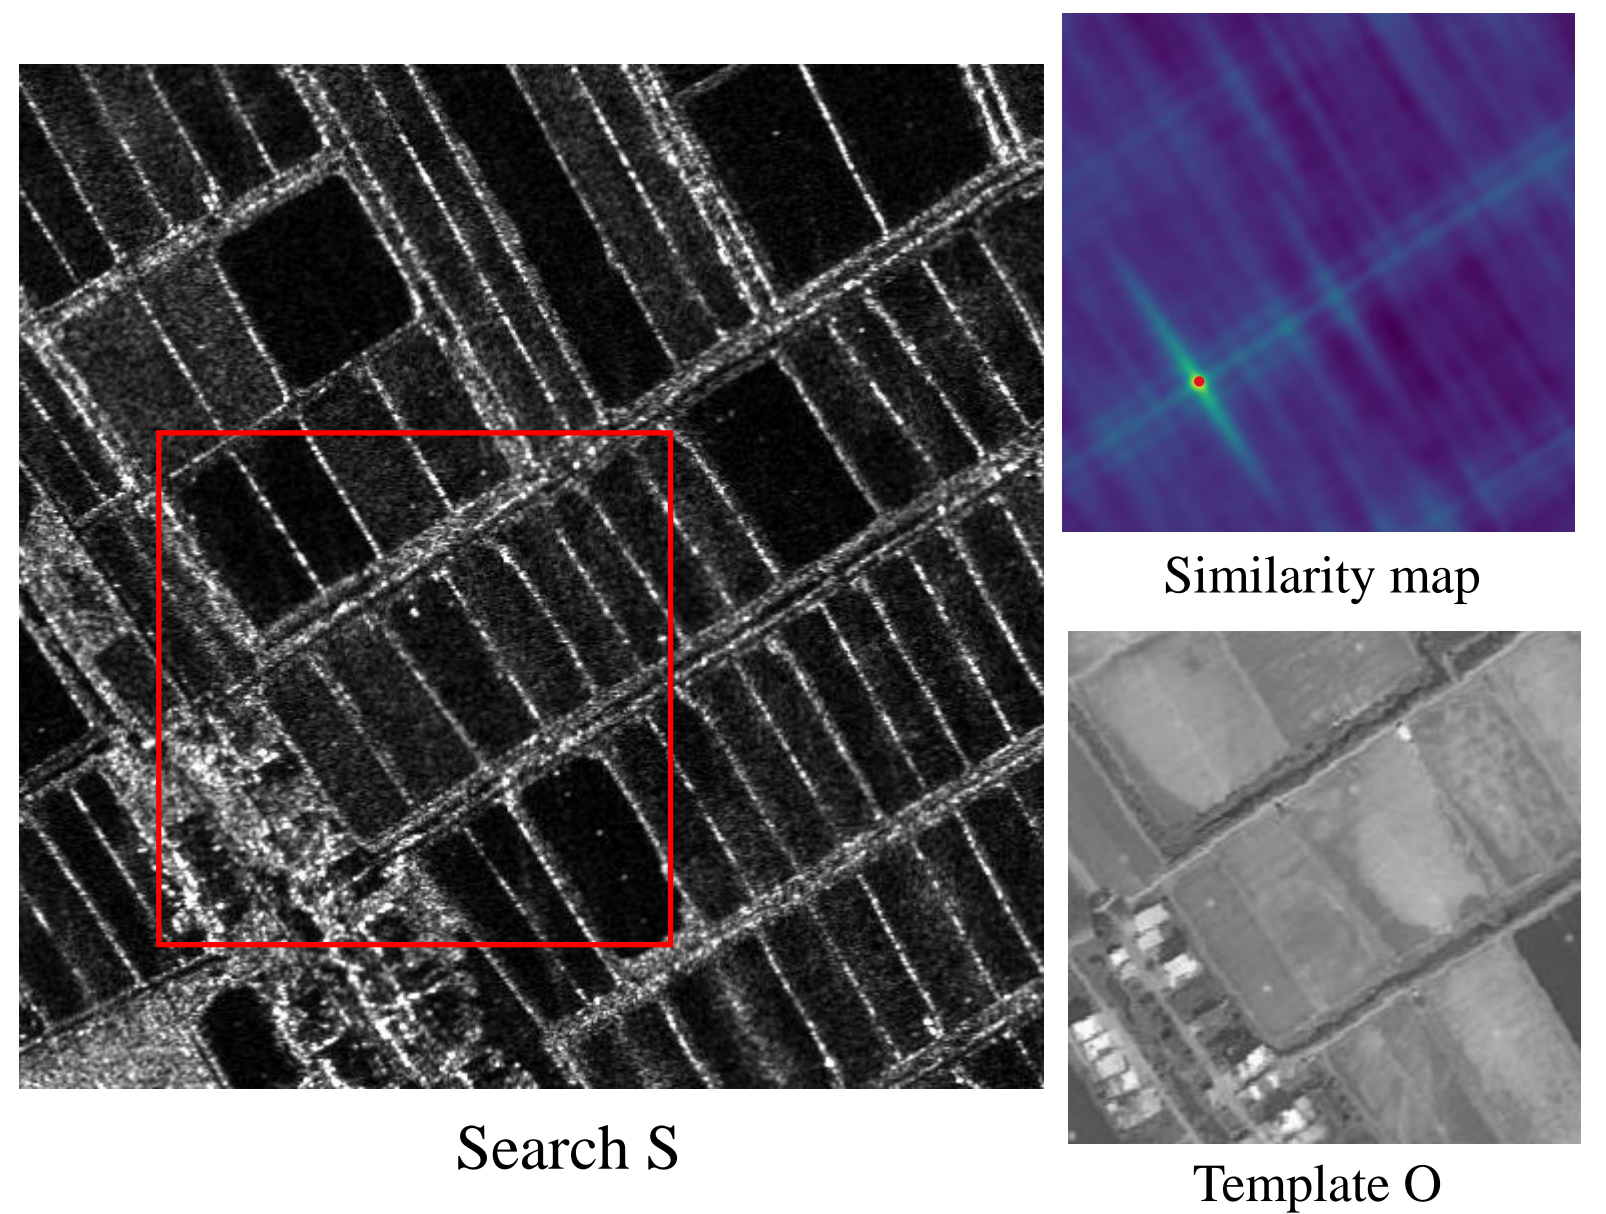

(c)

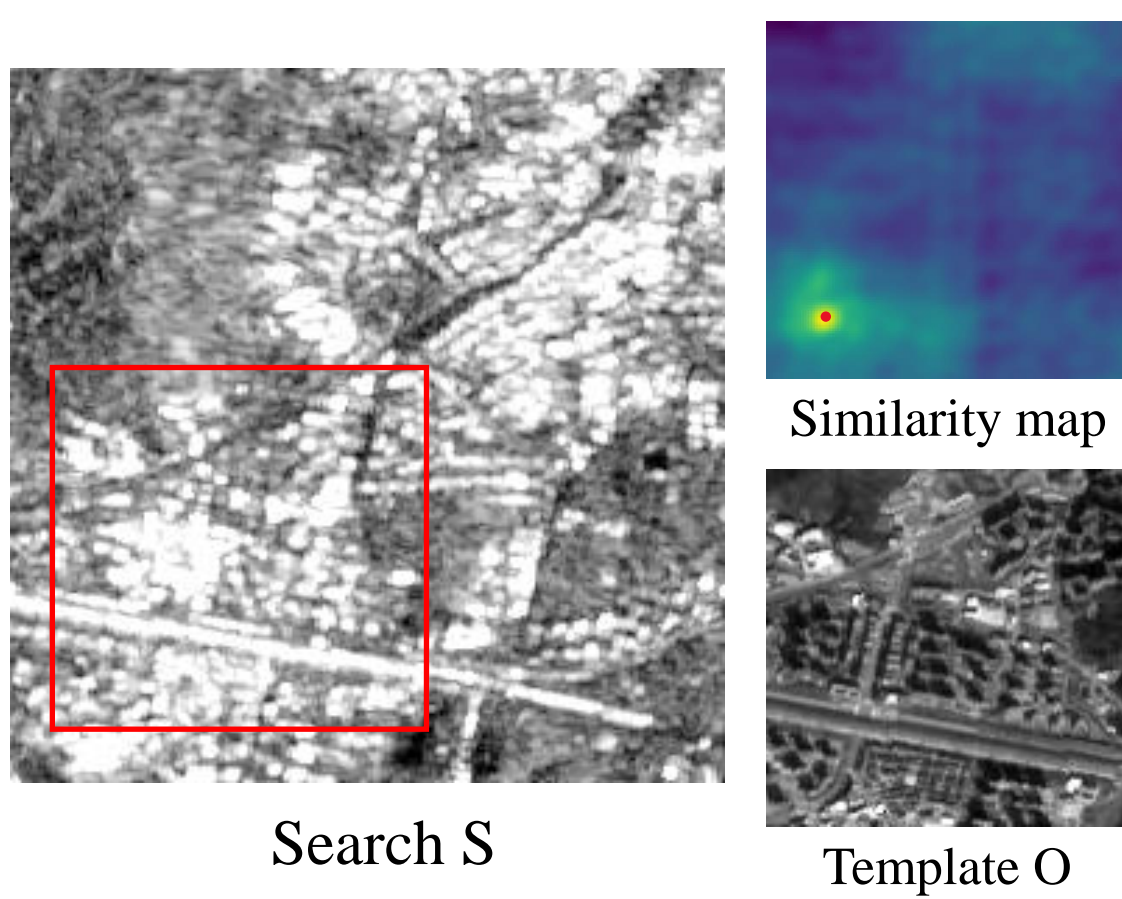

(b)

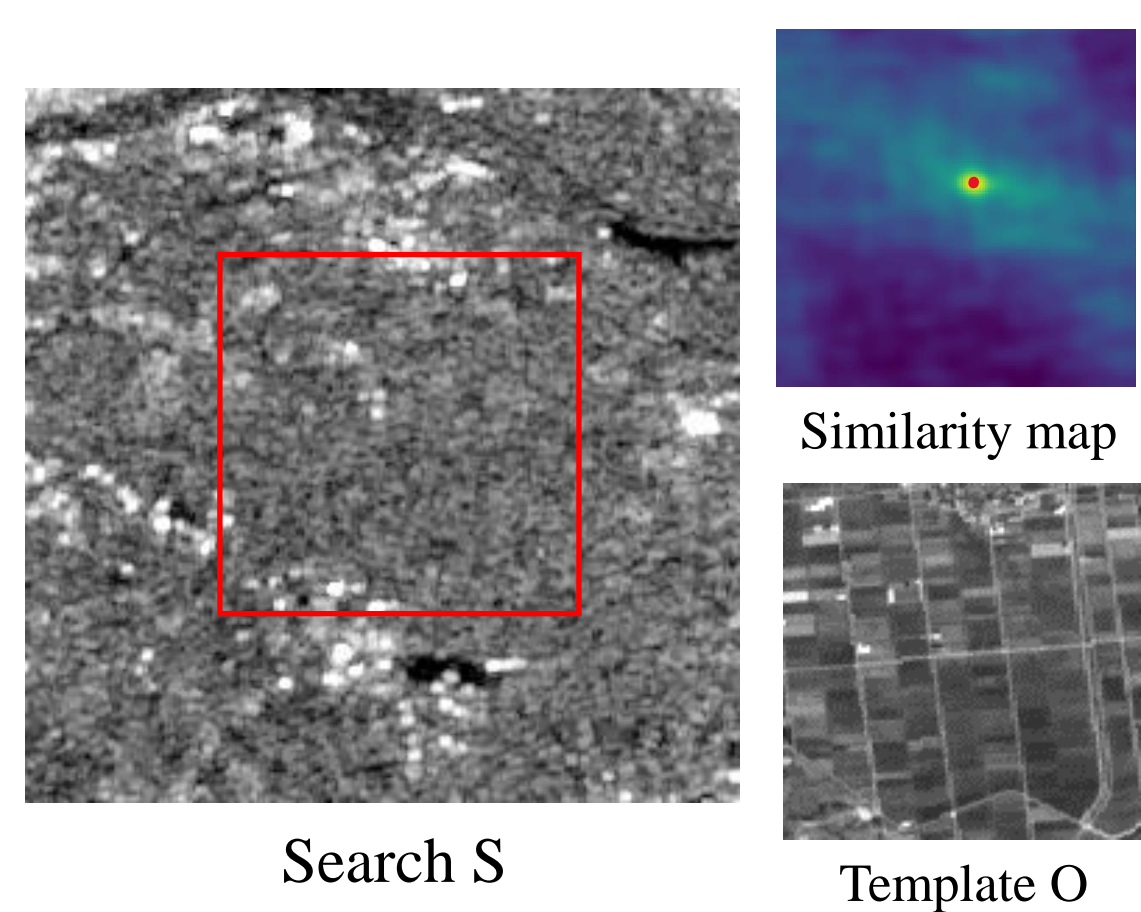

(d)

Urban built-up area

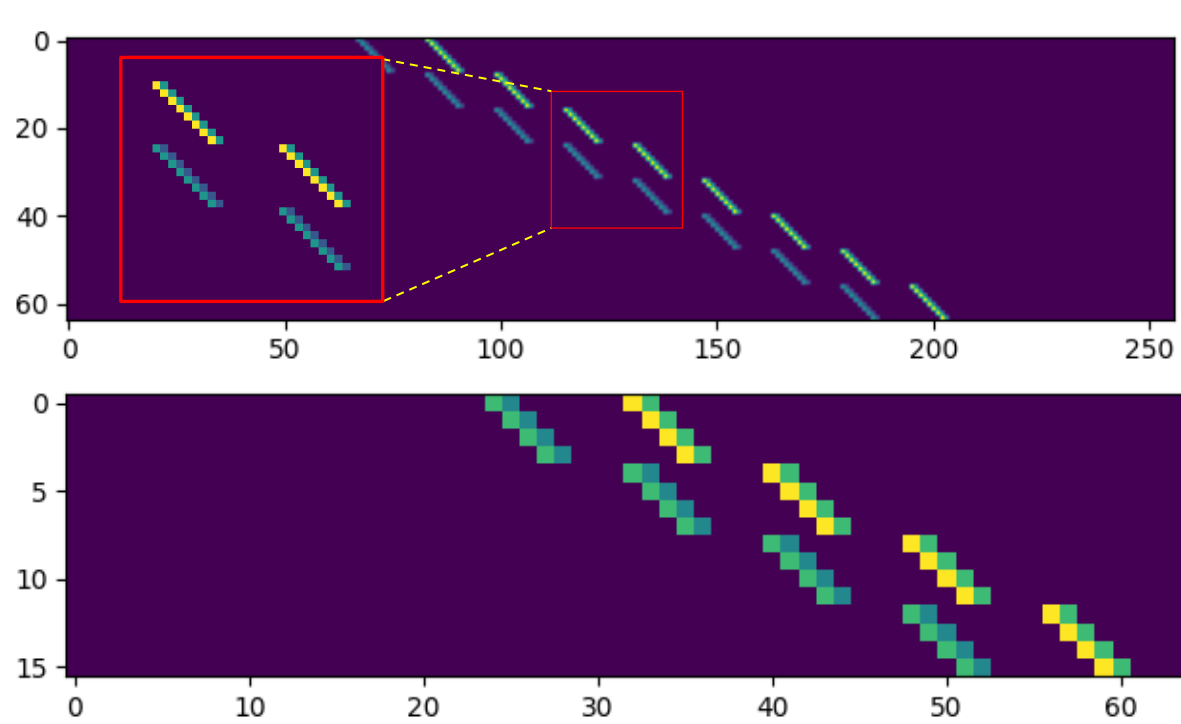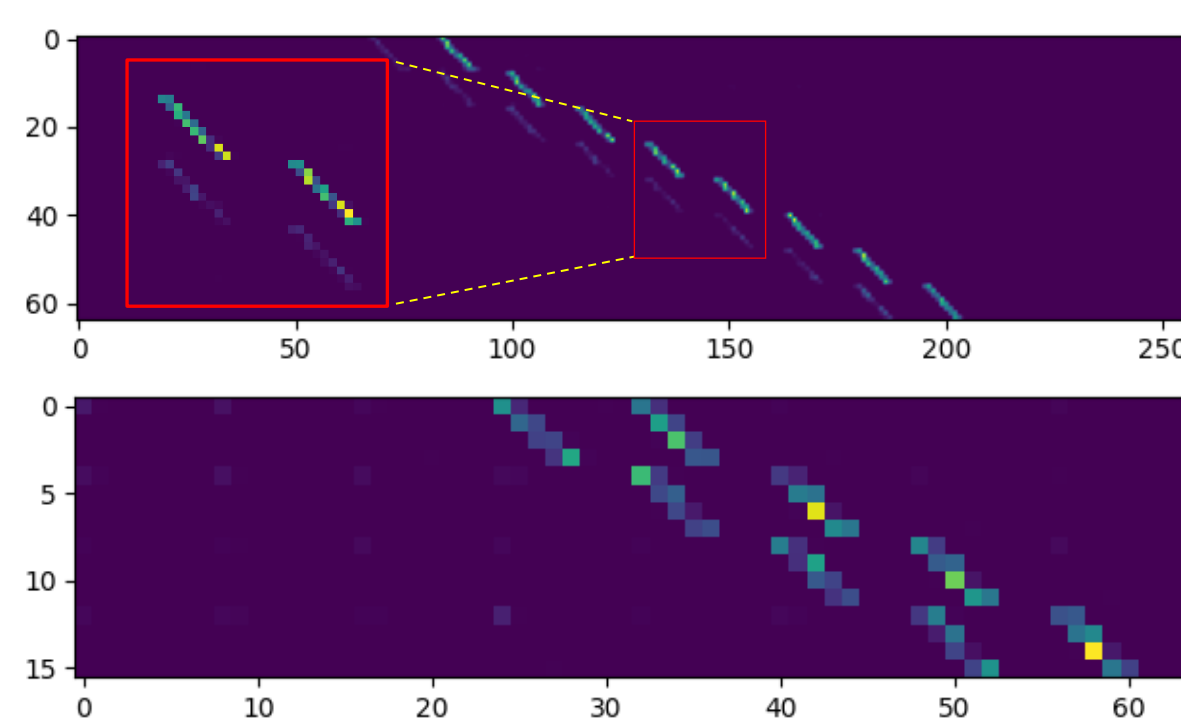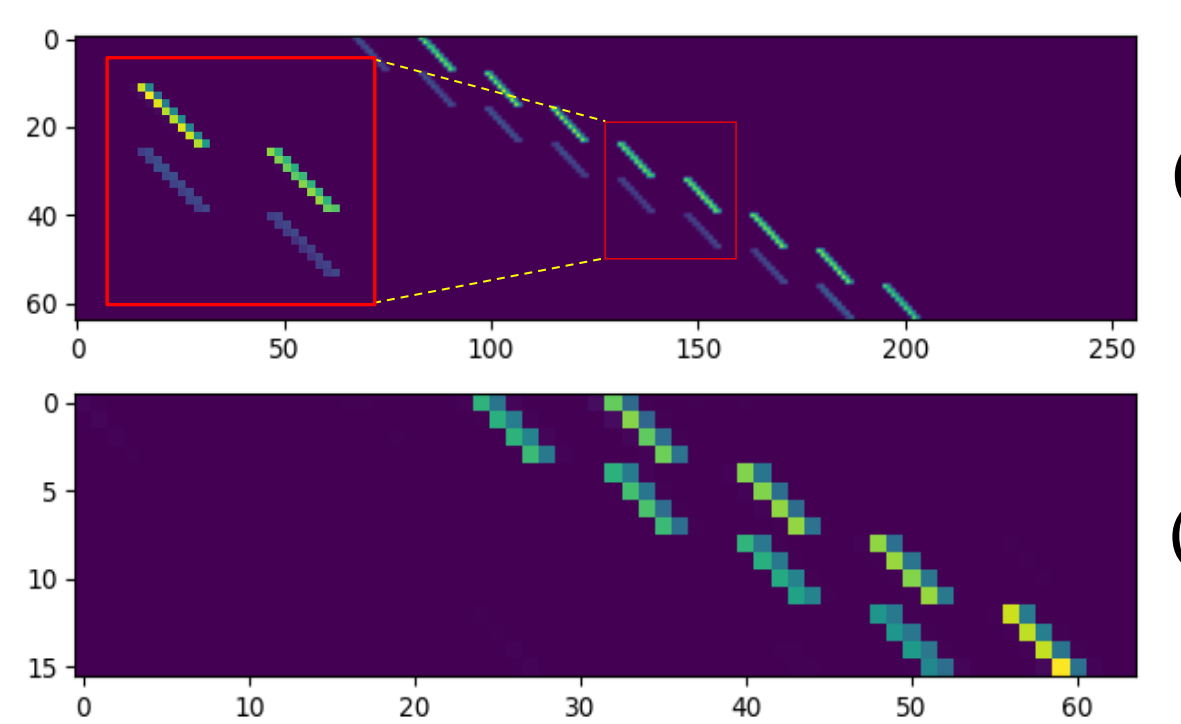

(a)

(b)

Rural farmland area

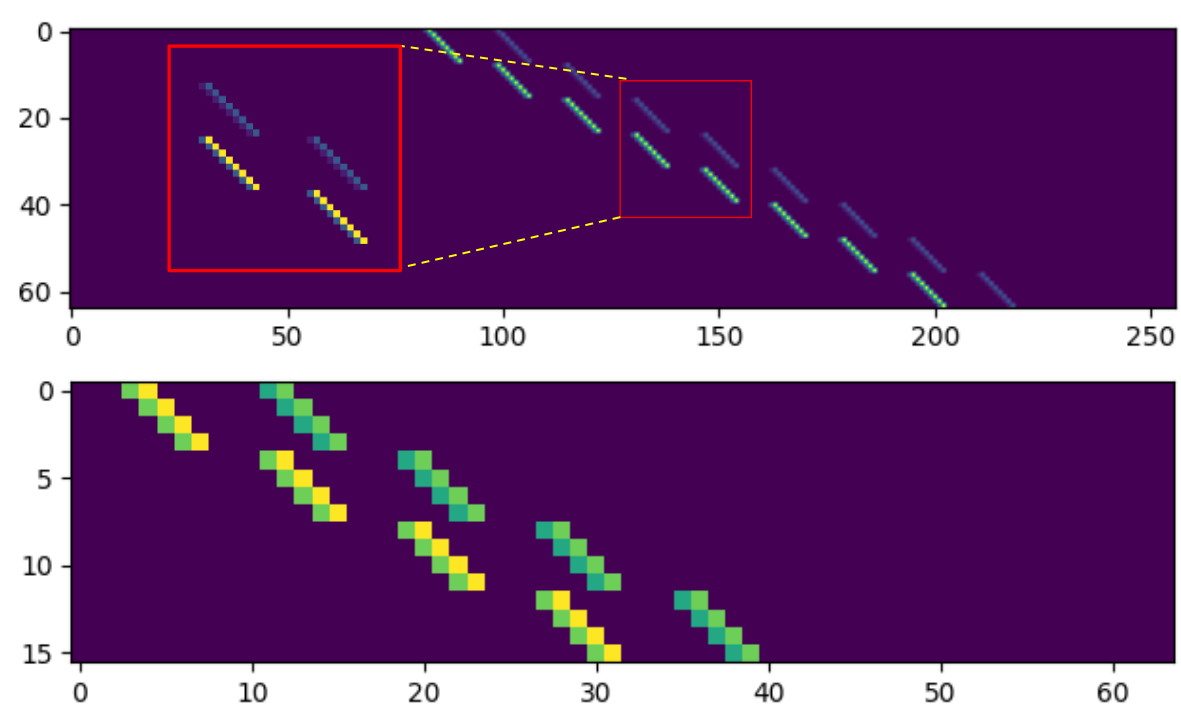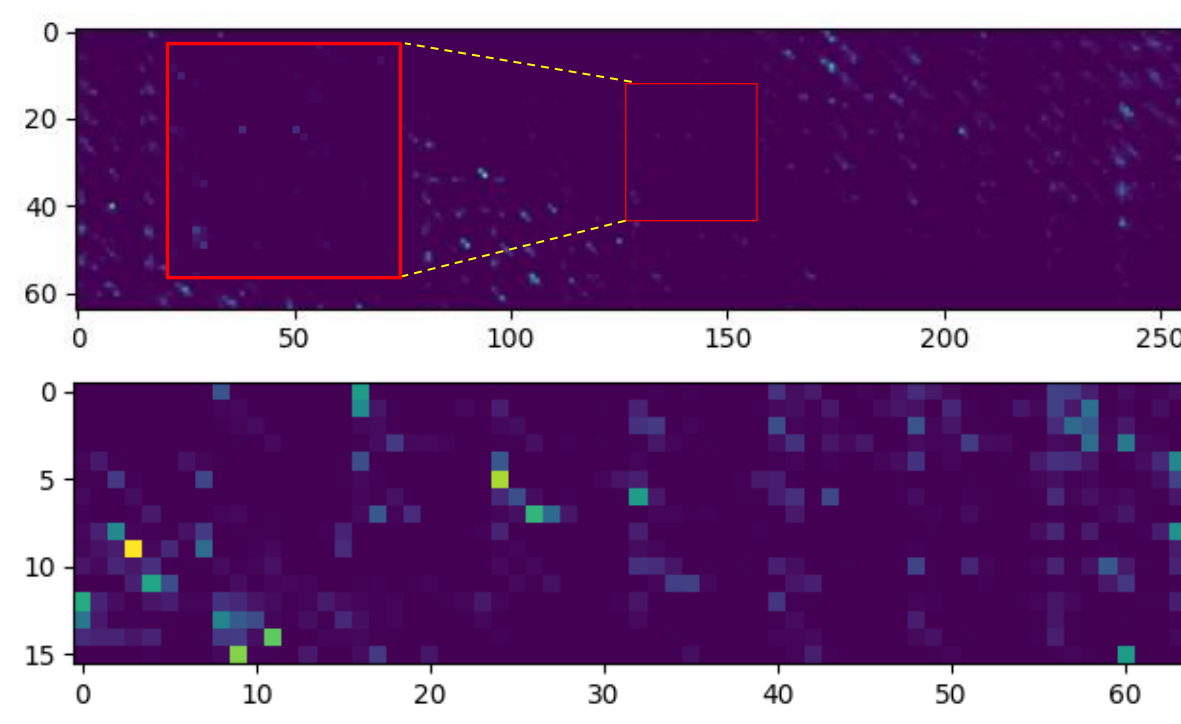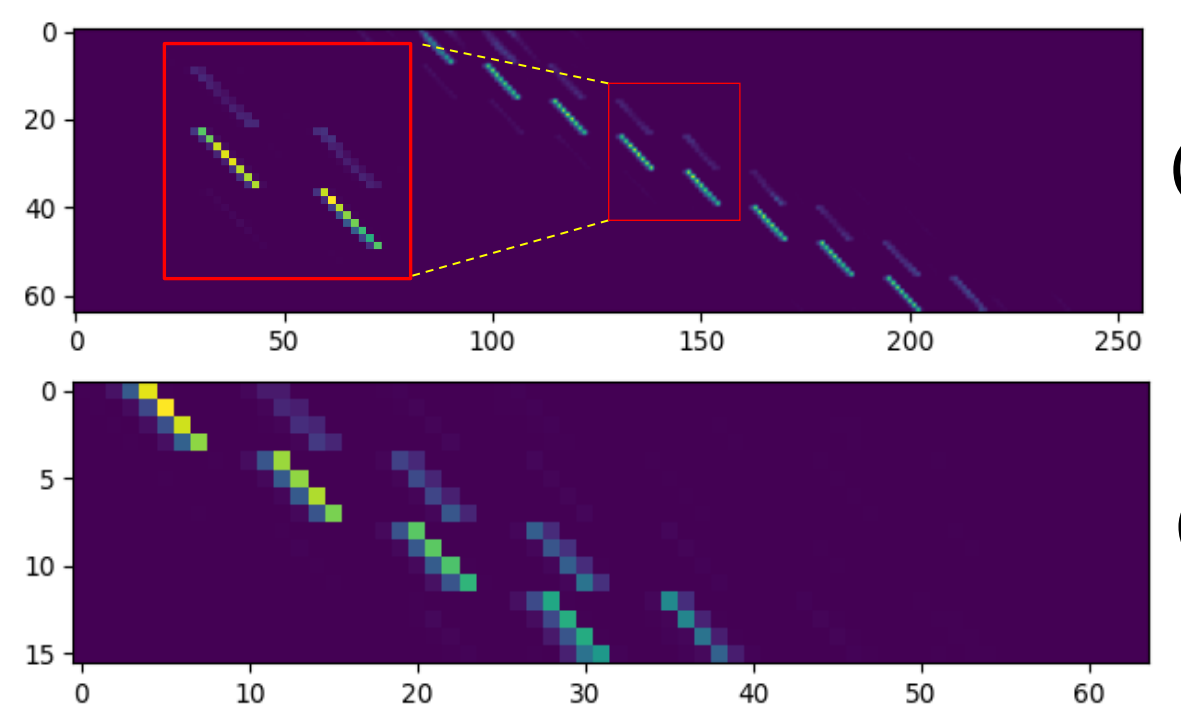

(c)

(d)

Ground truth

Pre-calibrated

Post-calibrated
