# Supplementary material
Source: ML conference proceedings conference paper supplement (https://openreview.net/forum?id=clKjOYw22x)

## Conditions

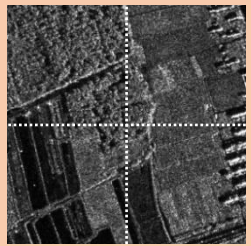

Search S

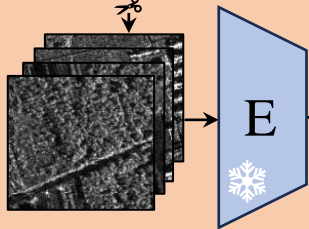

Patches

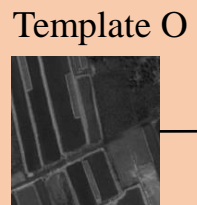

Template O

## Latent Space

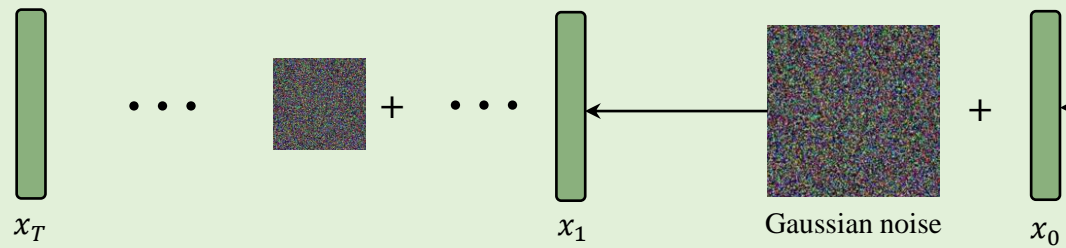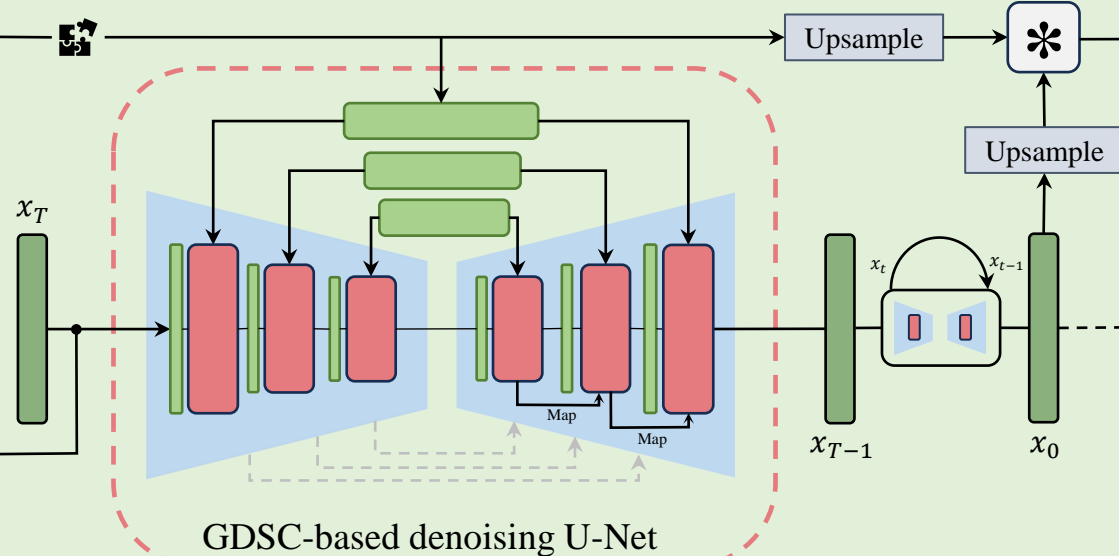

## Pixel Space

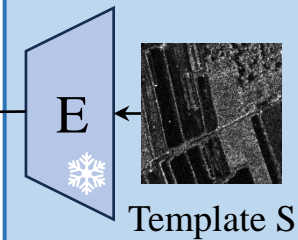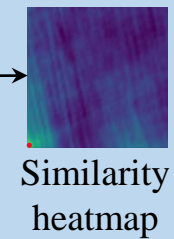

Similarity heatmap

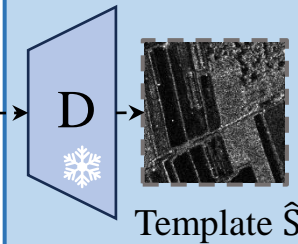

Divide

Stitch

Concat

Skip connection

Fixed Autoencoder

Conv Layer

FFT-based NCC

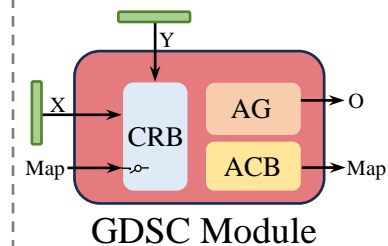

Supplement: supplementary_material [file attachment]
