# Supplementary material
Source: ML conference proceedings conference paper supplement (https://openreview.net/forum?id=clKjOYw22x)

Rural farmland area

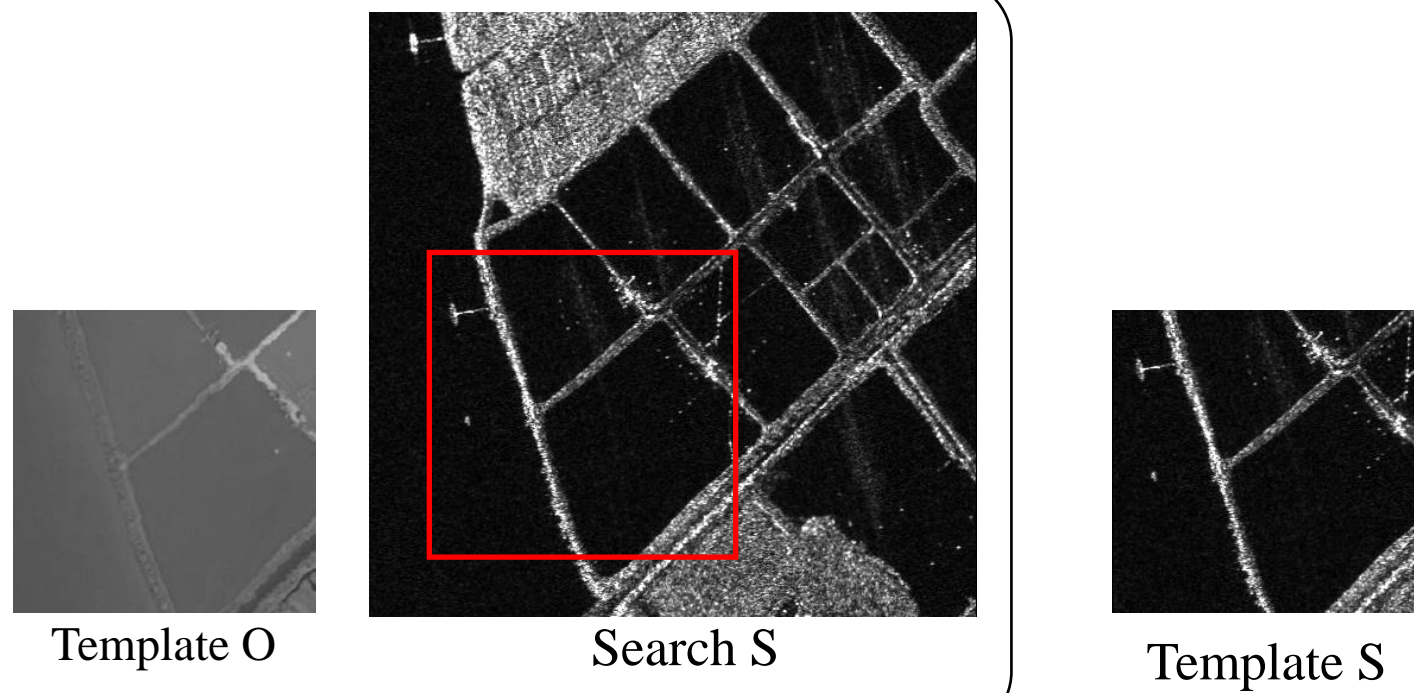

Urban road area

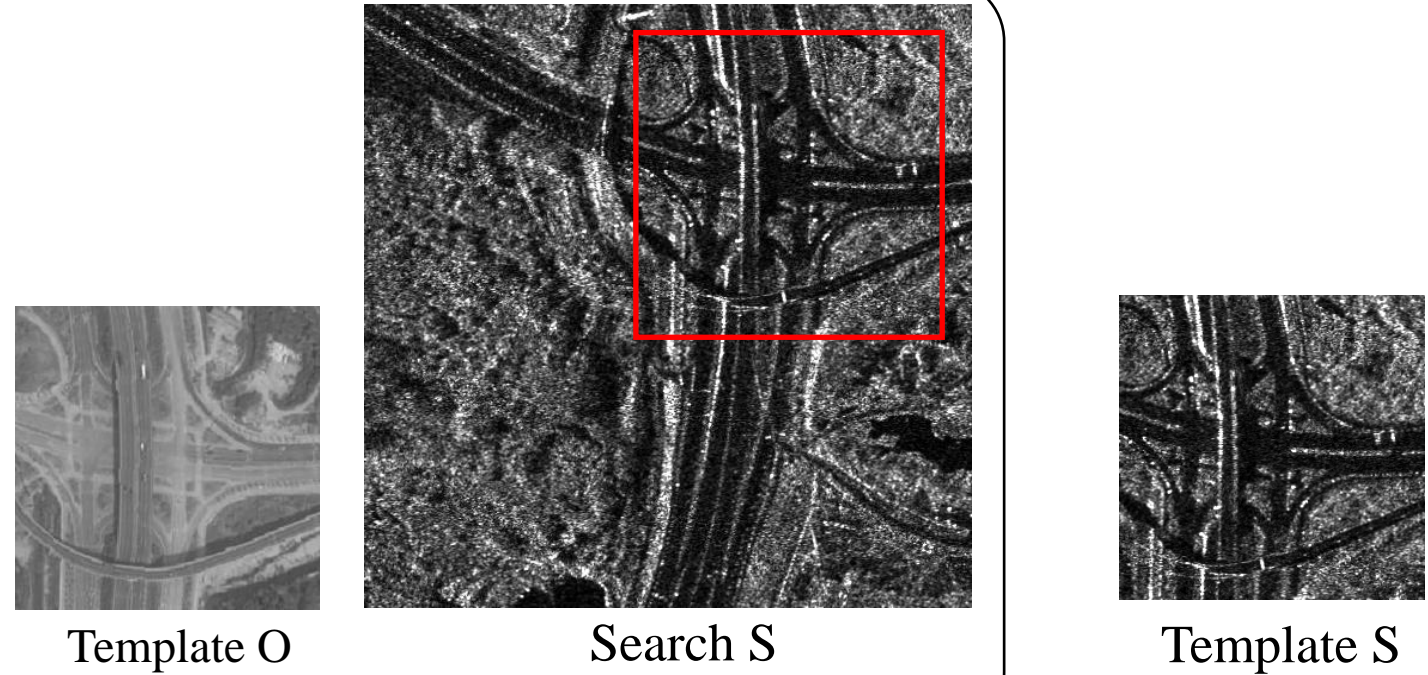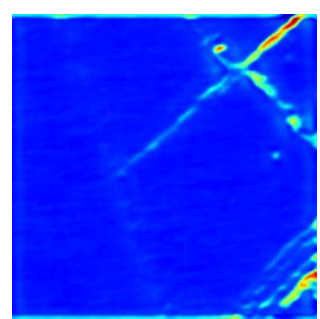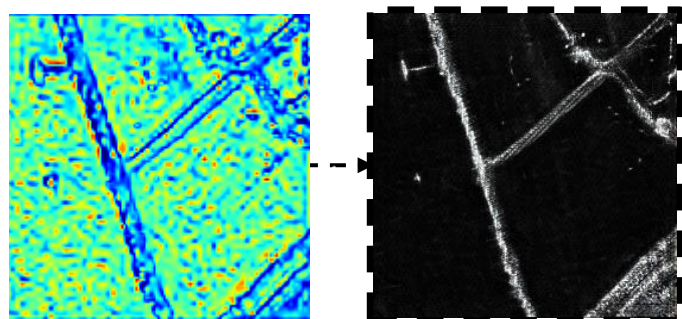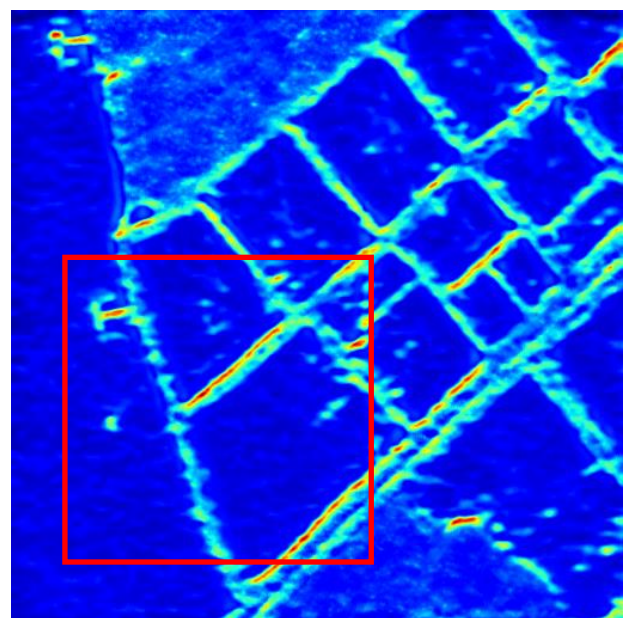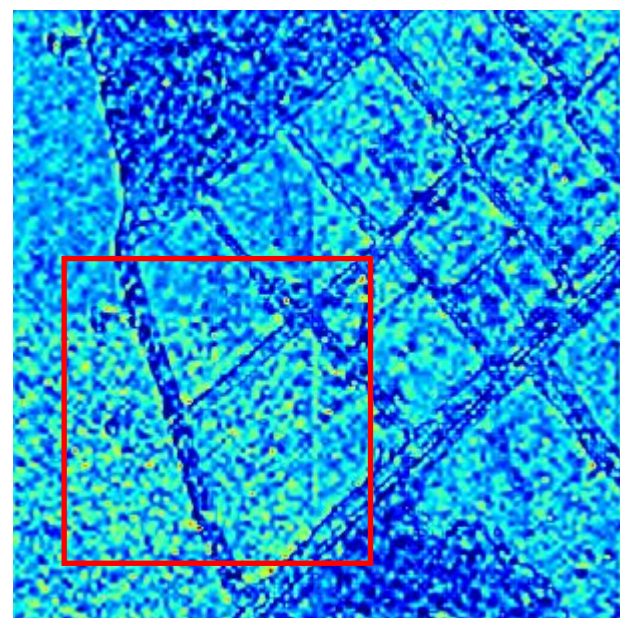

Cross-correlation

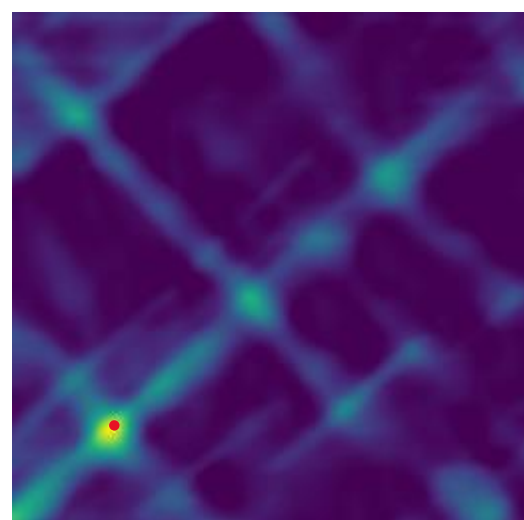

Cross-correlation

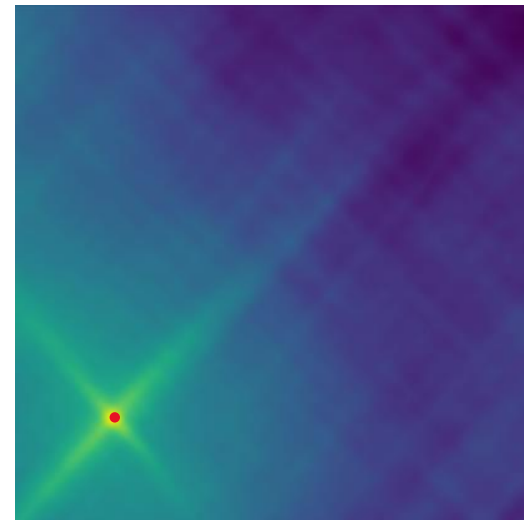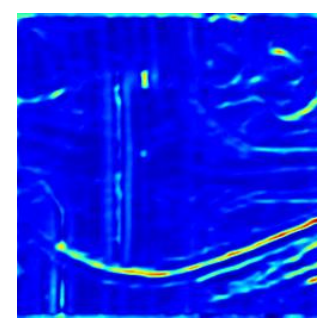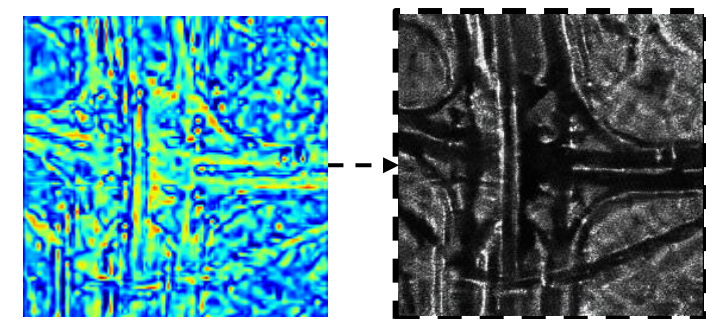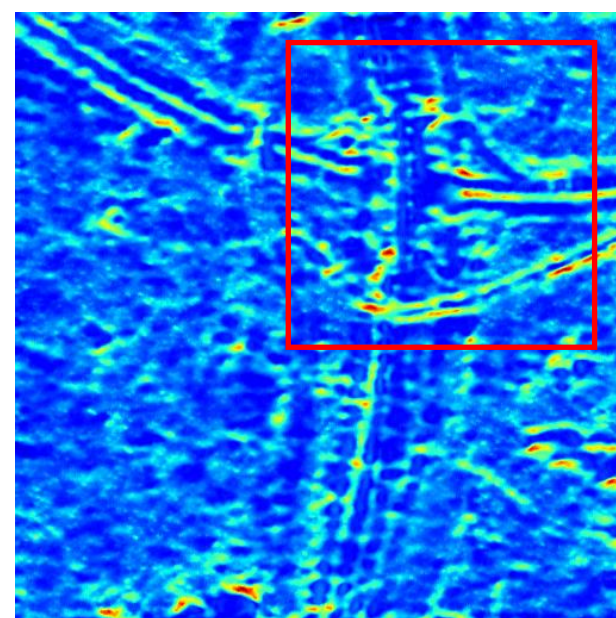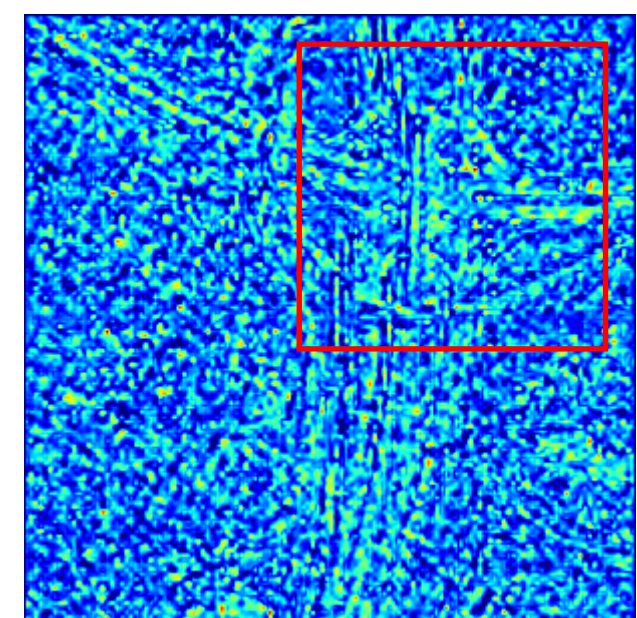

Cross-correlation

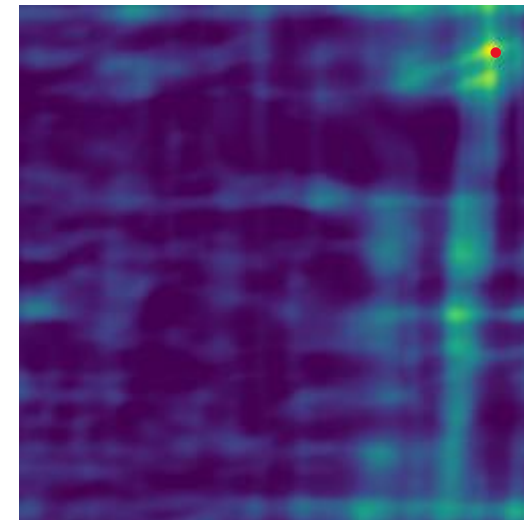

Cross-correlation

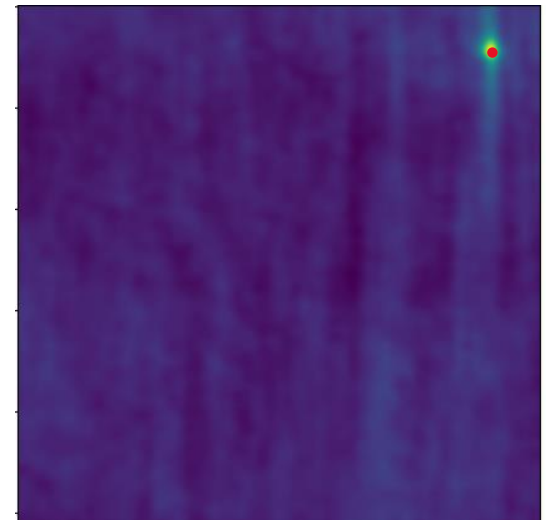

Supplement: supplementary_material [file attachment]
