# Supplementary material
Source: ML conference proceedings conference paper supplement (https://openreview.net/forum?id=clKjOYw22x)
Supplement: supplementary_material [file attachment]

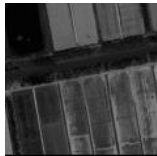

Template Image

Extract the shared  
features

Unknown  
space

Match

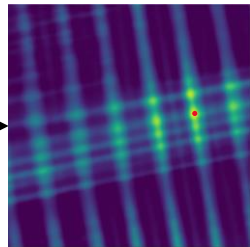

Similarity  
Heatmap

(a) Other methods

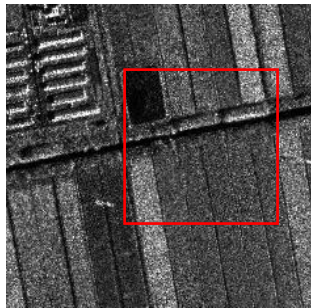

Search Image

Generating cross-  
modal image

Interpretable  
space

Match

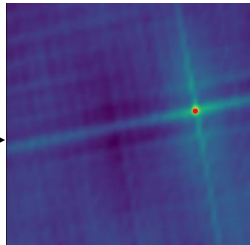

(b) The proposed method
