# Supplementary material
Source: ML conference proceedings conference paper supplement (https://openreview.net/forum?id=clKjOYw22x)

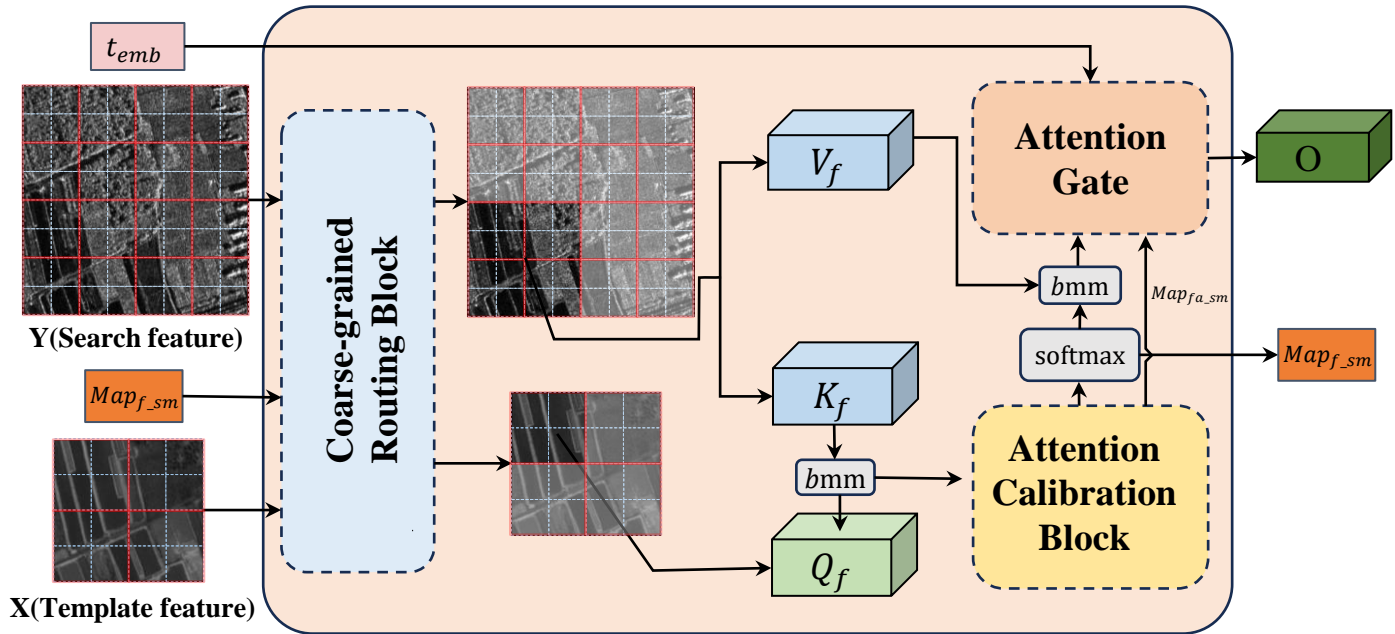

Supplement: supplementary_material [file attachment]

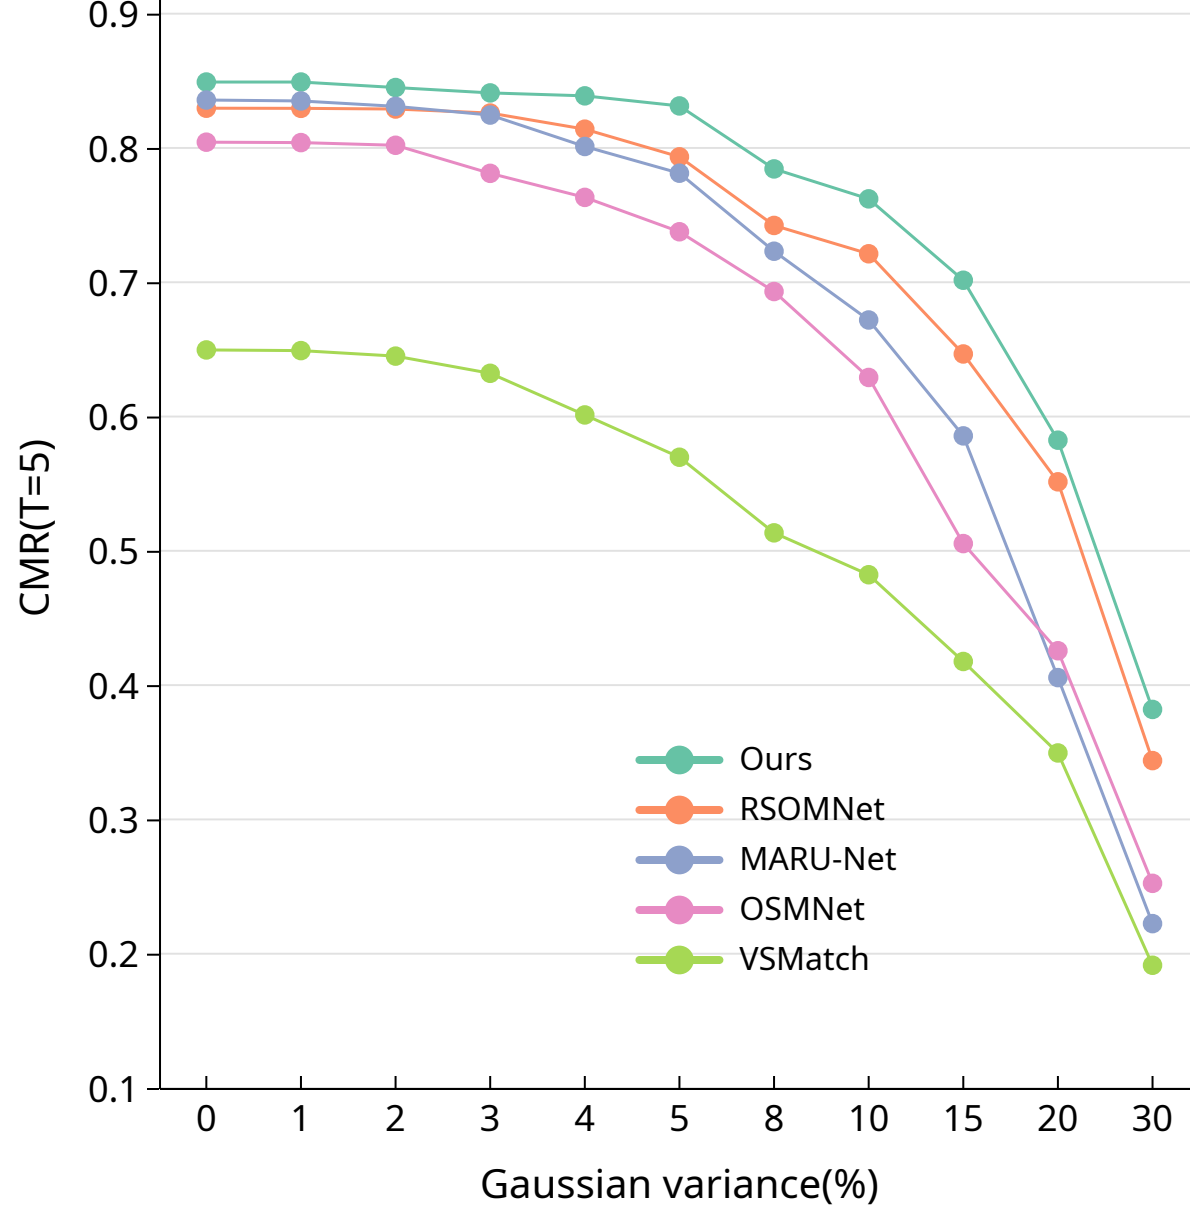

Supplement: supplementary_material [file attachment]

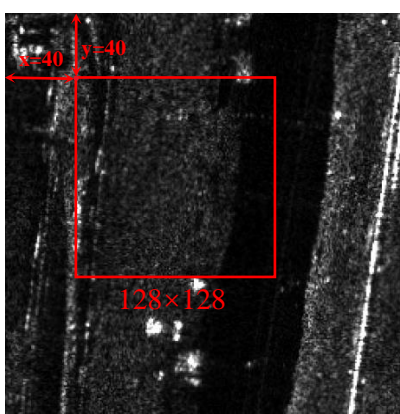

256×256(Image)

$32\times\downarrow$

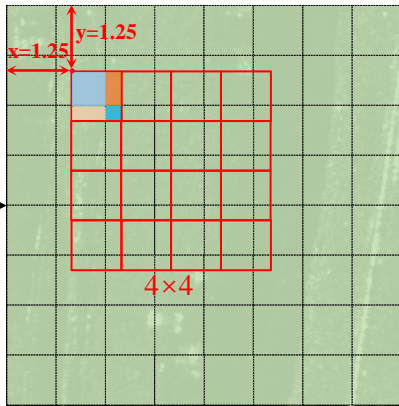

8×8(Feature map)

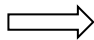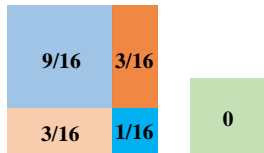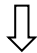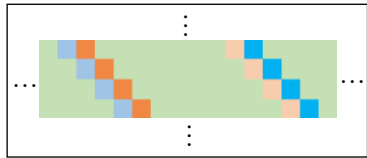

16×64(Attention map)

Supplement: supplementary_material [file attachment]

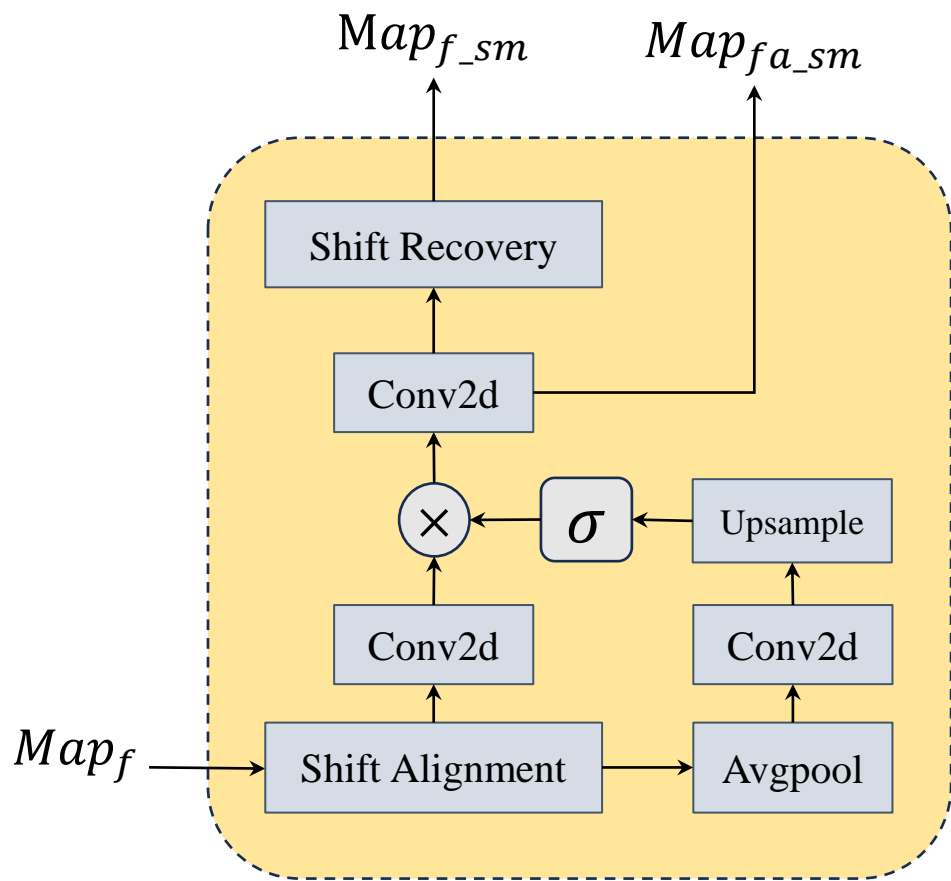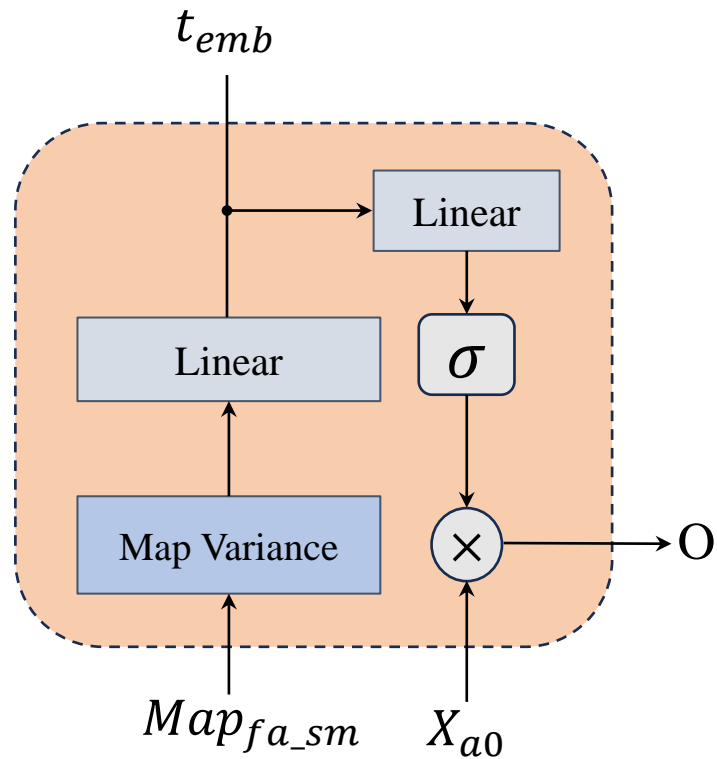

Supplement: supplementary_material [file attachment]

Rural farmland area

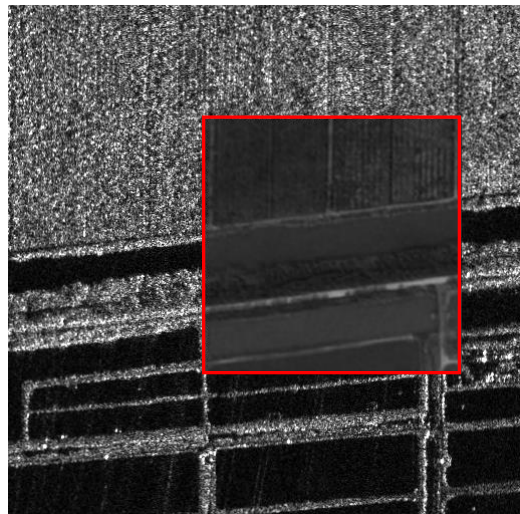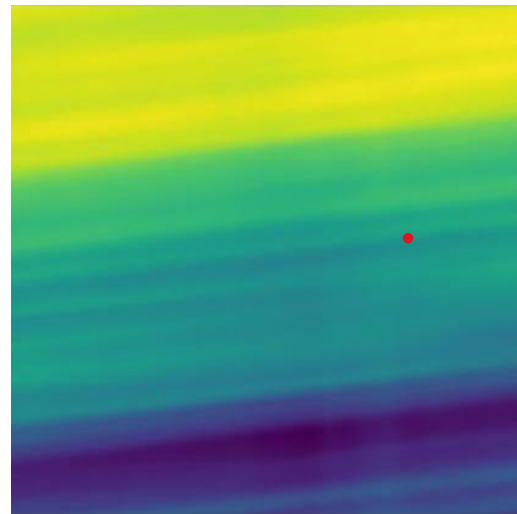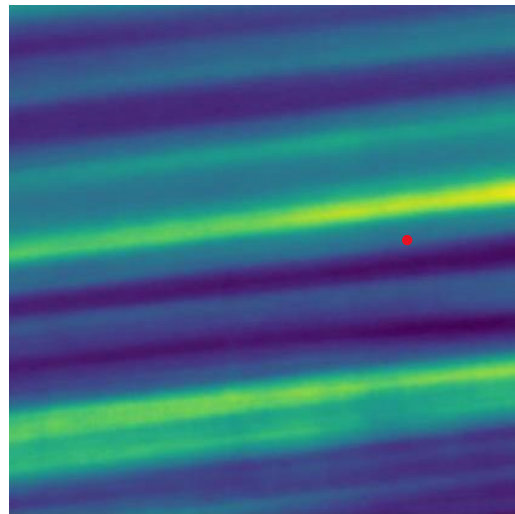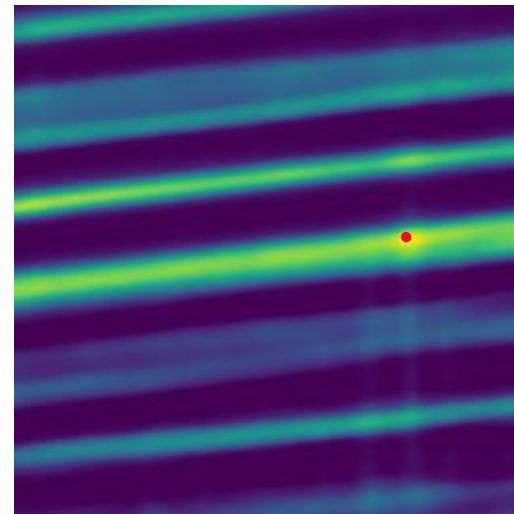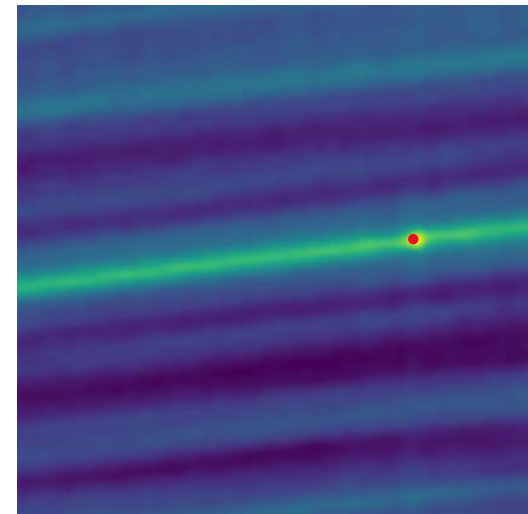

Urban built-up area

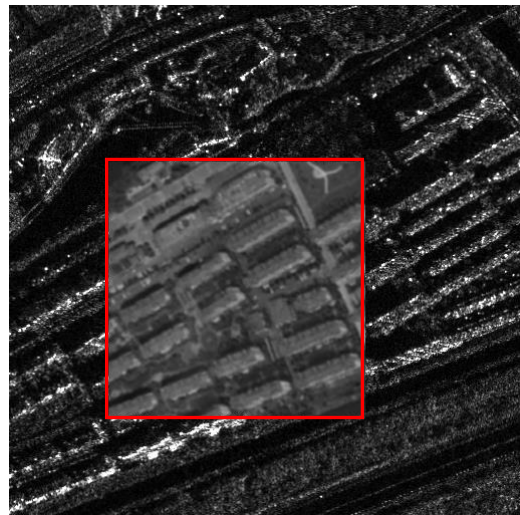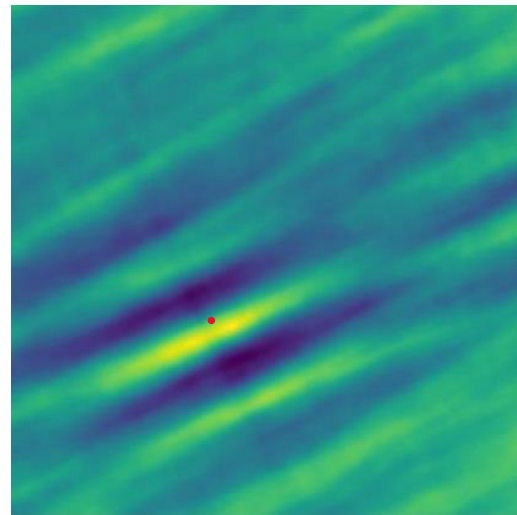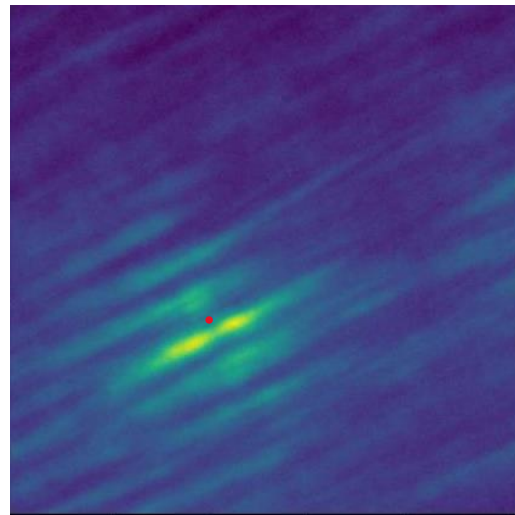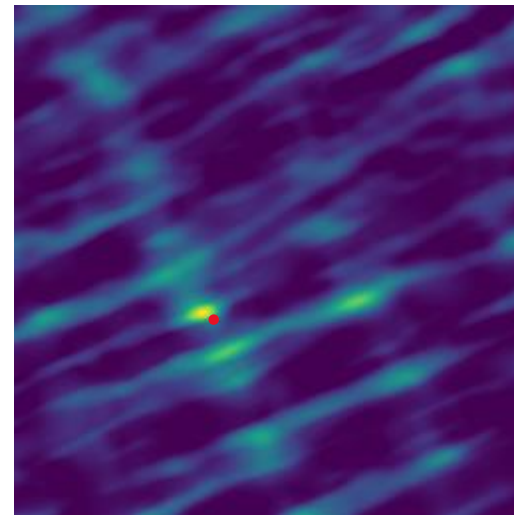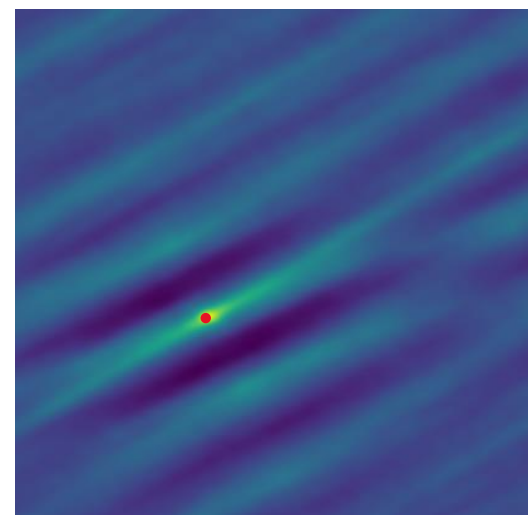

Ground truth

NMI

VSMATCH

MARU-Net

Proposed

Supplement: supplementary_material [file attachment]

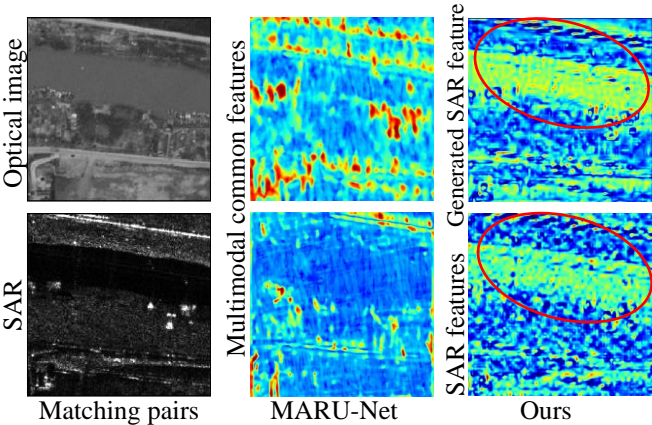

(a) Visual comparison of matching features

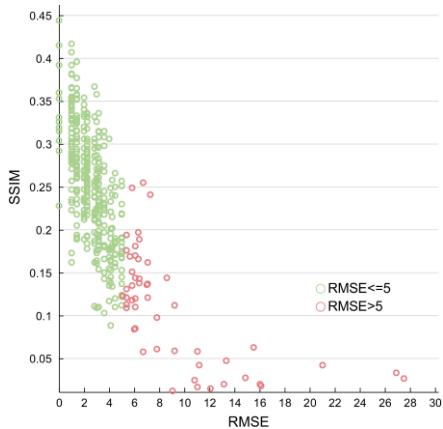

(b) Relation between matching RMSE and SSIM

Supplement: supplementary_material [file attachment]

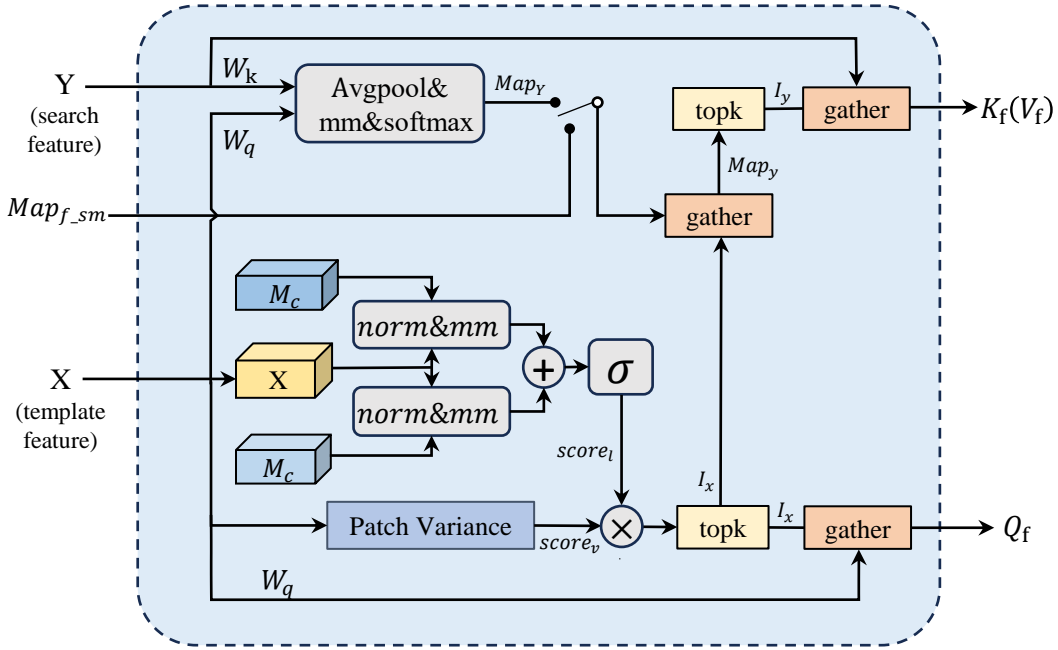

Supplement: supplementary_material [file attachment]

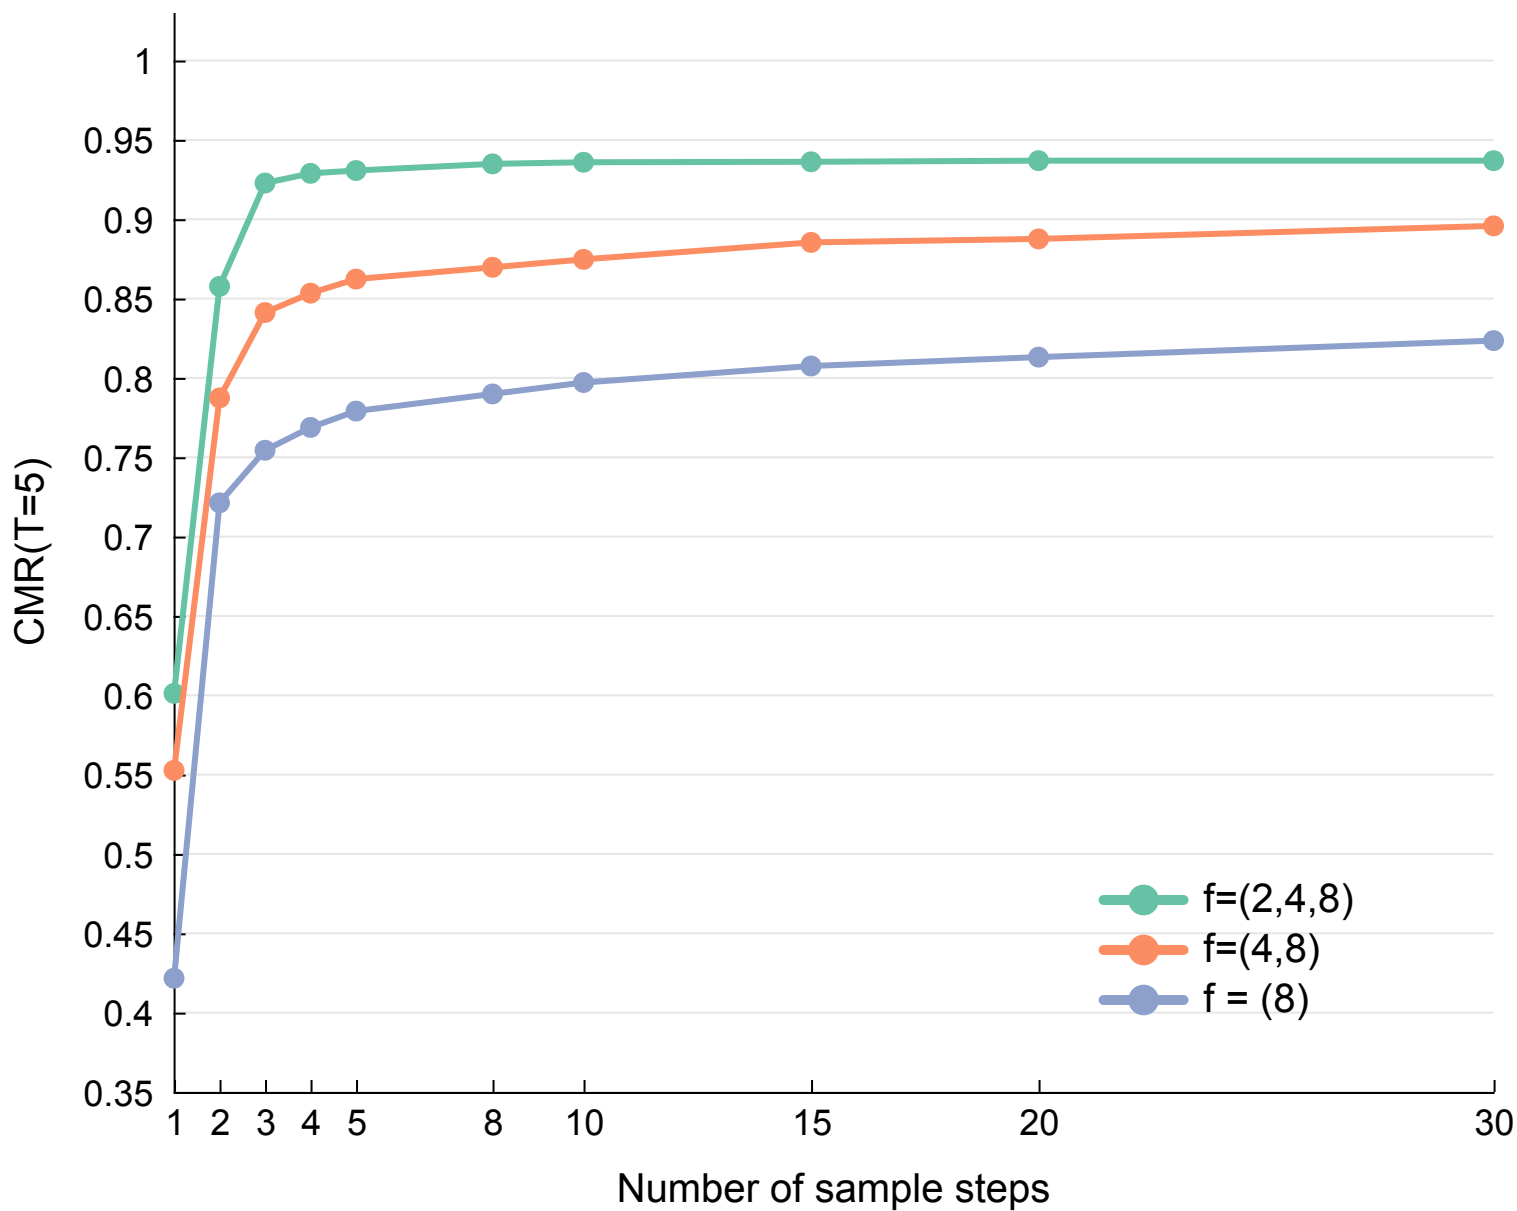

Supplement: supplementary_material [file attachment]
